# Supplementary material for: Meta-analysis reveals gut microbiome and functional pathway alterations in response to resistant starch
Source: Royal Society of Chemistry journal article supplement (doi:10.1039/d3fo00845b), 2023-01-01
Supplement: d3fo00845b1.pdf [file d3fo00845b1.pdf]

Supplementary Figure 1. Effects of RS intake on gut microbial  $\beta$ -diversity

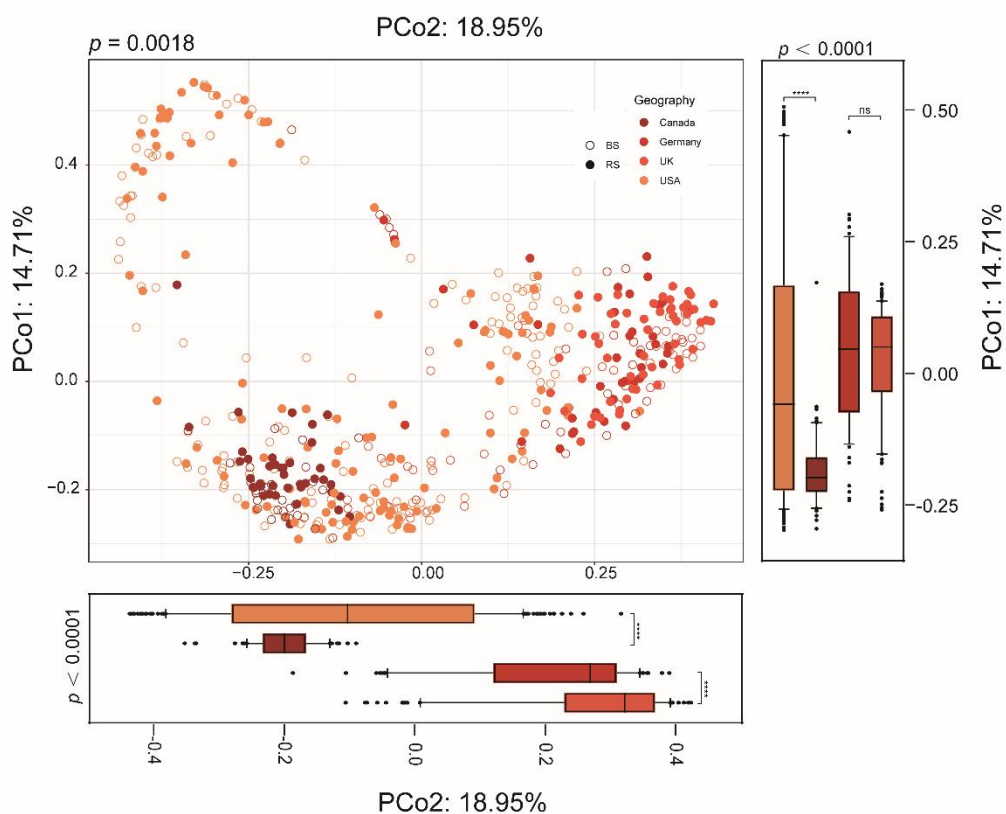

Principal coordinate analysis (PCoA) of gut microbiome between baseline and end point of RS intake by geographical region in all seven included studies. \*\*\*\*  $p < 0.0001$ ; ns  $p > 0.05$
