# Supplementary material for: Meta-analysis reveals gut microbiome and functional pathway alterations in response to resistant starch
Source: Royal Society of Chemistry journal article supplement (doi:10.1039/d3fo00845b), 2023-01-01
Supplement: d3fo00845b2.pdf [file d3fo00845b2.pdf]

## Supplementary Figure 2. KEGG enrichment analysis of different types of RS

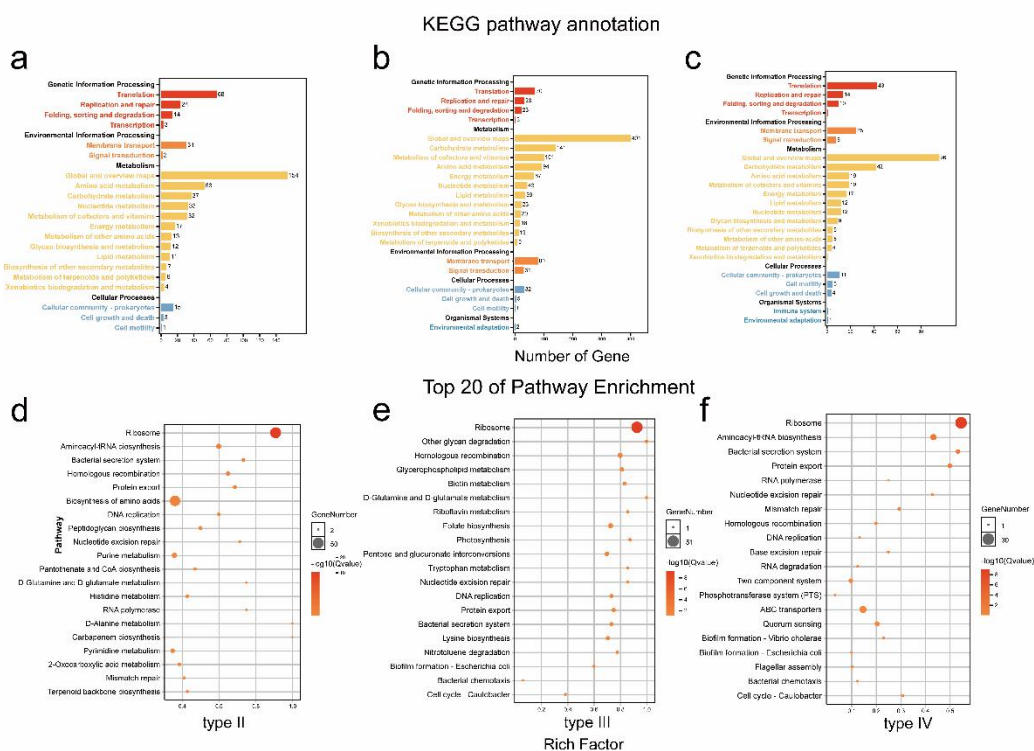

**a, b, c** Bar chart of enrichment pathway classification statistics of three types of RS. **d, e, f** Significant enrichment bubble plots of three types of RS.
