# Supplementary material for: Meta-analysis reveals gut microbiome and functional pathway alterations in response to resistant starch
Source: Royal Society of Chemistry journal article supplement (doi:10.1039/d3fo00845b), 2023-01-01
Supplement: d3fo00845b3.pdf [file d3fo00845b3.pdf]

**Supplementary Table 1. Meta-analysis of all seven included studies for gut taxa with differential relative abundances between baseline and end-point of RS intake.**

| Bacterial taxa (genus)                  | Pooled <i>p</i> -<br><i>value</i> | BS<br>median | RS<br>median | Log2fc  |
|-----------------------------------------|-----------------------------------|--------------|--------------|---------|
| <i>g__Blautia</i>                       | 0.0200                            | 0.0506       | 0.0411       | -0.3007 |
| <i>g__Roseburia</i>                     | 0.0194                            | 0.0094       | 0.0067       | -0.5031 |
| <i>g__Ruminococcaceae.UCG.013</i>       | 0.0000                            | 0.0025       | 0.0011       | -1.1430 |
| <i>g__Agathobacter</i>                  | 0.0417                            | 0.0102       | 0.0155       | 0.6014  |
| <i>g__Faecalibacterium</i>              | 0.0006                            | 0.0505       | 0.0683       | 0.4362  |
| <i>g__Ruminococcus.2</i>                | 0.0001                            | 0.0060       | 0.0141       | 1.2355  |
| <i>g__Fusicatenibacter</i>              | 0.0127                            | 0.0115       | 0.0076       | -0.5964 |
| <i>g__Ruminococcus.torques.group</i>    | 0.0000                            | 0.0073       | 0.0038       | -0.9659 |
| <i>g__Eubacterium.ventriosum.group</i>  | 0.0038                            | 0.0008       | 0.0003       | -1.4905 |
| <i>g__Ruminococcaceae.NK4A214.group</i> | 0.0074                            | 0.0014       | 0.0005       | -1.4775 |
| <i>g__Erysipelotrichaceae.UCG.003</i>   | 0.0011                            | 0.0019       | 0.0008       | -1.1983 |
| <i>g__Bifidobacterium</i>               | 0.0031                            | 0.0070       | 0.0156       | 1.1606  |
| <i>g__Eubacterium.eligens.group</i>     | 0.0008                            | 0.0023       | 0.0008       | -1.4527 |
| <i>g__UBA1819</i>                       | 0.0022                            | 0.0004       | 0.0002       | -1.2213 |
| <i>g__Coprococcus.3</i>                 | 0.0255                            | 0.0033       | 0.0021       | -0.6141 |

Only those with pooled *p*-values < 0.05 are shown.
